# Supplementary material for: Prognostic value of the seventh AJCC/UICC TNM classification of non-cardia gastric cancer
Source: PubMed Central journal article supplement (PMC3686645; doi:10.1186/1477-7819-11-103), 2013-05-20
Supplement: 1477-7819-11-103-S1.pdf [file 1477-7819-11-103-S1.pdf]

Table 1. TNM classifications of the sixth and seventh editions are shown.

|       |     |                    | M0                 |      |      |    | M1 |
|-------|-----|--------------------|--------------------|------|------|----|----|
|       |     |                    | N0                 | N1   | N2   | N3 |    |
|       |     |                    | No. of involved LN |      |      |    |    |
| Depth |     | 0                  | 1-6                | 7-15 | 16-  |    |    |
| M0    | T1  | Mucosa, submucosa  | IA                 | IB   | II   | IV | IV |
|       | T2a | Muscularis propria | IB                 | II   | IIIA | IV | IV |
|       | T2b | Subserosa          |                    |      |      |    |    |
|       | T3  | Serosa             | II                 | IIIA | IIIB | IV | IV |
|       | T4  | Adjacent structure | IIIA               | IV   | IV   | IV | IV |
| M1    |     |                    | IV                 | IV   | IV   | IV | IV |

|       |     |                    | M0                 |      |      |      |      | M1 |
|-------|-----|--------------------|--------------------|------|------|------|------|----|
|       |     |                    | N0                 | N1   | N2   | N3a  | N3b  |    |
|       |     |                    | No. of involved LN |      |      |      |      |    |
| Depth |     | 0                  | 1-2                | 3-6  | 7-15 | 16-  |      |    |
| M0    | T1  | Mucosa, submucosa  | IA                 | IB   | IIA  | IIB  | IIB  | IV |
|       | T2  | Muscularis propria | IB                 | IIA  | IIB  | IIIA | IIIA | IV |
|       | T3  | Subserosa          | IIA                | IIB  | IIIA | IIIB | IIIB | IV |
|       | T4a | Serosa             | IIB                | IIIA | IIIB | IIIC | IIIC | IV |
|       | T4b | Adjacent structure | IIIB               | IIIB | IIIC | IIIC | IIIC | IV |
| M1    |     |                    | IV                 | IV   | IV   | IV   | IV   | IV |
