# Supplementary material for: Prognostic value of the seventh AJCC/UICC TNM classification of non-cardia gastric cancer
Source: PubMed Central journal article supplement (PMC3686645; doi:10.1186/1477-7819-11-103), 2013-05-20
Supplement: 1477-7819-11-103-S2.pdf [file 1477-7819-11-103-S2.pdf]

**Table 3. Seventh TNM edition patients' subdivision**

|           | pN0(0)             | pN1 (1-2)          | pN2 (3-6)          | pN3a (7-15)        | pN3b(>15)          | M1                 |
|-----------|--------------------|--------------------|--------------------|--------------------|--------------------|--------------------|
| pT1 (MSM) | IA 15.79%<br>n= 18 | IB 2.63% n=3       | IIA: 0% n=0        | IIB: 0% n=0        | IIB: 0%<br>n=0     |                    |
| pT2 (MP)  | IB 9.65%<br>n=11   | IIA: 0% n=0        | IIB 2.63%<br>n=3   | IIIA: 1.75%<br>n=2 | IIIA: 0.88%<br>n=1 |                    |
| pT3 (SS)  | IIA: 1.75%<br>n=2  | IIB: 0.88%<br>n=1  | IIIA: 3.51%<br>n=4 | IIIB 3.51%<br>n=4  | IIIB 1.75%<br>n=2  |                    |
| pT4a (Se) | IIB: 7.02%<br>n=8  | IIIA: 4.38%<br>n=5 | IIIB 3.51%<br>n=4  | IIIC: 4.38%<br>n=5 | IIIC: 6.14%<br>n=7 |                    |
| pT4b (Si) | IIIB 6.14%<br>n=7  | IIIB 4.38%<br>n=5  | IIIC 0.88%<br>n=1  | IIIC: 2.63%<br>n=3 | IIIC: 3.51%<br>n=4 |                    |
| M1        |                    |                    |                    |                    |                    | IV: 12.28%<br>n=14 |
