# Supplementary material for: Prognostic value of the seventh AJCC/UICC TNM classification of non-cardia gastric cancer
Source: PubMed Central journal article supplement (PMC3686645; doi:10.1186/1477-7819-11-103), 2013-05-20
Supplement: 1477-7819-11-103-S3.pdf [file 1477-7819-11-103-S3.pdf]

**Table 4. Sixth TNM edition patients' subdivision**

|            | pN0 (0)             | pN1(1-6)           | pN2 (7-15)         | pN3 (>15)        | M1                 |
|------------|---------------------|--------------------|--------------------|------------------|--------------------|
| pT1 (M/SM) | IA: 16.67%<br>n= 19 | IB: 2.63%<br>n=3   | II 0% n=0          | IV: 0% N=0       |                    |
| pT2a (MP)  | IB: 7.02%<br>n=8    | II: 2.63% n=3      | IIIA: 2.63%<br>n=3 | IV: 0% n=0       |                    |
| pT2b (SS)  | IB: 3.51%<br>n=4    | II: 3.51% n=4      | IIIA: 3.51%<br>n=4 | IV: 1.75%<br>N=2 |                    |
| pT3 (Se)   | II: 6.14%<br>n=7    | IIIA:8.77%<br>n=10 | IIIB: 3.51%<br>n=4 | IV: 6.14%<br>n=7 |                    |
| pT4 (Si)   | III A 7.02%<br>n= 8 | IV: 4.38% n=5      | IV: 1.75%<br>n=2   | IV: 4.38%<br>n=5 |                    |
|            |                     |                    |                    |                  | IV: 14.04%<br>n=16 |
