# Supplementary material for: Prognostic value of the seventh AJCC/UICC TNM classification of non-cardia gastric cancer
Source: PubMed Central journal article supplement (PMC3686645; doi:10.1186/1477-7819-11-103), 2013-05-20
Supplement: 1477-7819-11-103-S4.pdf [file 1477-7819-11-103-S4.pdf]

Table 5. Univariate and multivariate analyses

|                                       |         | Global survival     |         |                  |         |                  |         |
|---------------------------------------|---------|---------------------|---------|------------------|---------|------------------|---------|
|                                       |         | Univariate          |         | Multivariate     |         |                  |         |
|                                       |         | HR (95% IC)         | p value | HR (95% IC)      | p value | HR (95% IC)      | p value |
| SEX (female vs male)                  |         | 0.63 (0.34-1.18)    | 0.148   |                  |         |                  |         |
| AGE                                   |         | 1.00 (0.99-1.03)    | 0.862   |                  |         |                  |         |
| TUMOR LOCATION (L)                    |         |                     |         |                  |         |                  |         |
|                                       | M       | 0.60 (0.29-1.25)    | 0.175   |                  |         |                  |         |
|                                       | U       | 1.20 (0.29-5.09)    | 0.806   |                  |         |                  |         |
|                                       | LMU     | 1.78 (0.42-7.58)    | 0.458   |                  |         |                  |         |
|                                       | ML      | 1.39 (0.53-3.65)    | 0.501   |                  |         |                  |         |
|                                       | UM      | -                   | -       |                  |         |                  |         |
|                                       | STUMP   | 2.77 (0.64-11.95)   | 0.172   |                  |         |                  |         |
| LAUREN GRADE (Intestinal riferimento) |         |                     |         |                  |         |                  |         |
|                                       | Diffuse | 1.52 (0.85-2.73)    | 0.160   |                  |         |                  |         |
|                                       | Mixed   | 1.29 (0.17-9.58)    | 0.804   |                  |         |                  |         |
| LYMPHOVASCULAR INVASION (yes vs no)   |         | 9.36 (3.67-23.88)   | <0.001  | 3.18 (1.01-9.99) | 0.048   | 3.08 (1.09-8.72) | 0.035   |
| NEOADIUVANTE (yes vs no)              |         | 0.94 (0.34-2.63)    | 0.909   |                  |         |                  |         |
| ADIUVANTE (yes vs no)                 |         | 1.85 (1.02-3.36)    | 0.044   | 0.88 (0.47-1.64) | 0.681   | 0.64 (0.33-1.24) | 0.189   |
| HIPEC (yes vs no)                     |         | 1.32 (0.52-3.37)    | 0.566   |                  |         |                  |         |
| TNM_6 (IA riferimento)                |         |                     |         |                  |         |                  |         |
|                                       | IB      | 0.68 (0.06-7.51)    | 0.754   |                  |         |                  |         |
|                                       | II      | 3.05 (0.56-16.71)   | 0.199   |                  |         |                  |         |
|                                       | IIIA    | 5.56 (1.22-25.42)   | 0.027   |                  |         |                  |         |
|                                       | IIIB    | 4.70 (0.66-33.48)   | 0.123   |                  |         |                  |         |
|                                       | IV      | 18.31 (4.29-78.14)  | <0.001  |                  |         |                  |         |
| TEST PER TREND TNM_6                  |         | 1.88 (1.52-2.32)    | <0.001  | 1.58 (1.22-2.05) | 0.001   |                  |         |
| TNM_7 (IA riferimento)                |         |                     |         |                  |         |                  |         |
|                                       | IB      | 0.70 (0.06-7.75)    | 0.773   |                  |         |                  |         |
|                                       | IIA     | -                   | -       |                  |         |                  |         |
|                                       | IIIB    | 1.67 (0.23-11.86)   | 0.610   |                  |         |                  |         |
|                                       | IIIA    | 6.23 (1.12-34.56)   | 0.036   |                  |         |                  |         |
|                                       | IIIB    | 5.15 (1.13-23.50)   | 0.035   |                  |         |                  |         |
|                                       | IIIC    | 13.79 (3.06-62.19)  | 0.001   |                  |         |                  |         |
|                                       | IV      | 33.11 (7.18-152.64) | <0.001  |                  |         |                  |         |
| TEST PER TREND TNM_7                  |         | 1.82 (1.49-2.24)    | <0.001  |                  |         | 1.70 (1.33-2.17) | <0.001  |
